# Supplementary material for: 100 plus years of stem cell research—20 years of ISSCR
Source: PubMed Central journal article supplement (PMC9213821; doi:10.1016/j.stemcr.2022.04.004), 2022-06-14
Supplement: mmc1.pdf [file mmc1.pdf]

**Stem Cell Reports, Volume 17**

**Supplemental Information**

**100 plus years of stem cell research—20 years of ISSCR**

**Urban Lendahl**

# ISSCR Annual Meetings and International Symposia

## **Annual Meetings:**

- 2021 – virtual meeting because of the COVID-19 pandemic (originally planned to be held in Hamburg, Germany)
- 2020 – virtual meeting because of the COVID-19 pandemic (originally planned to be held in Boston, US)
- 2019 – Los Angeles, US
- 2018 – Melbourne, Australia
- 2017 – Boston, US
- 2016 – San Francisco, US
- 2015 – Stockholm, Sweden
- 2014 – Vancouver, Canada
- 2013 – Boston, US
- 2012 – Yokohama, Japan
- 2011 – Toronto, Canada
- 2010 – San Francisco, US
- 2009 – Barcelona, Spain
- 2008 – Philadelphia, US
- 2007 – Cairns, Australia
- 2006 – Toronto, Canada
- 2005 – San Francisco, US
- 2004 – Boston, US
- 2003 – Washington DC, US

## **International Symposia:**

- 2021 – virtual meetings because of the COVID-19 pandemic
- 2020 – virtual meetings because of the COVID-19 pandemic
- 2019 – Amsterdam, the Netherlands  
Seoul, South Korea  
Toronto, Canada
- 2018 - Lausanne, Switzerland
- 2017 - Basel, Switzerland  
Guangzhou, China
- 2016 - Dresden, Germany  
Florence, Italy  
Kyoto, Japan
- 2015 - Sozhou, China
- 2014 - San Diego, US  
Singapore
- 2013 - Florence, Italy  
Sozhou, China
- 2012 - Boston, US

San Francisco, US  
Sao Paulo, Brazil  
2011 - Sozhou, China  
2010 - Amsterdam, the Netherlands  
Boston, US  
2009 - Buenos Aires, Argentina  
2008 - Shanghai, China

**Supplementary Figure 1:**

A list of ISSCR Annual Meetings and International Symposia.

# ISSCR Awards and Awardees

## **ISSCR Dr. Susan Lim Award for Outstanding Young Investigator (2009-2017 called the ISSCR Outstanding Young Investigator Award)**

*The ISSCR Dr. Susan Lim Award for Outstanding Young Investigator, supported by the Dr. Susan Lim Endowment for Education and Research Ltd., recognizes the exceptional achievements of an investigator in the early part of their independent career in stem cell research.*

### **Awardees:**

2021 - Madeline Lancaster  
2020 - Allon M. Klein  
2019 – Barbara Treutlein  
2018 – Shuibing Chen  
2017 – Jayaraj Rajagopal  
2016 – Fernando Camargo  
2015 – Paul Tesar  
2014 – Valentina Greco  
2013 – Marius Wernig  
2012 – Cédric Blanpain  
2011 – Robert Blelloch  
2010 – Joanna Wysocka  
2009 – Konrad Hochedlinger

## **ISSCR Achievement Award (introduced in 2020)**

*The ISSCR Achievement Award recognizes the transformative body of work of an investigator that has had a major impact on the field of stem cell research or regenerative medicine.*

### **Awardees:**

2021 – Janet Rossant

## **ISSCR Momentum Award (introduced in 2020)**

*The ISSCR Momentum Award recognizes the exceptional achievements of an investigator whose innovative research has established a major area of stem cell-related research with a strong trajectory for future success.*

### **Awardees:**

2021 – Valentina Greco

## **ISSCR Public Service Award (introduced in 2011)**

The ISSCR Public Service Award is given in recognition of outstanding contributions of public service to the fields of stem cell research and regenerative medicine.

**Awardees:**

2021 – Robin Lovell-Badge  
2020 – Susan L. Solomon  
2019 – Eli and Edythe Broad  
2018 – Megan Munsie  
2017 – George Q. Daley  
2015 – Alan Trounson  
2014 – Paolo Bianco, Elena Cattaneo, Michele De Luca  
2013 – Hiromitsu Ogawa, Betty Jean Crouch Ogawa  
2012 – Rob and Cheryl McEwen  
2011 – Robert Klein

**ISSCR Tobias Award Lecture (2016-2021)**

*The ISSCR Tobias Award Lecture was established in 2015 by the Tobias Foundation. The award recognized original and promising basic hematology research as well as direct translational or clinical research related to cell therapy in hematological disorders.*

**Awardees:**

2021 – Stuart H. Orkin  
2020 – Margaret A. Goodell  
2019 – Scott Armstrong  
2018 – Connie Eaves  
2017 – John Dick  
2016 – Leonard Zon

**ISSCR Award for Innovation (2018-2019; 2011-2017 called the McEwen Award for Innovation)**

*The ISSCR Award for Innovation recognized a transformative breakthrough that has had a major impact on the field of stem cell research or regenerative medicine.*

**Awardees:**

2019 - John Dick  
2018 – Michele De Luca, Graziella Pellegrini  
2017 – Elaine Fuchs  
2016 – Austin Smith, Qi-Long Ying  
2015 – Hans Clevers, Irving Weissman  
2014 – Azim Surani  
2013 – James A. Thomson  
2012 – Rudolf Jaenisch  
2011 – Kazutoshi Takahashi, Shinya Yamanaka

**Other awards:**

The ISSCR Zhongmei Chen Yong Awards for Scientific Excellence (travel awards)  
ISSCR Poster Awards  
ISSCR Merit Abstract Awards

**Supplementary Figure 2:**

A list of ISSCR Awards and Awardees.
